# Supplementary material for: Iridium(iii) phosphors with rigid fused-heterocyclic chelating architectures for efficient deep-red/near-infrared emissions in polymer light-emitting diodes
Source: Royal Society of Chemistry journal article supplement (doi:10.1039/c9tc03645h), 2019-01-01
Supplement: c9tc03645h1.pdf [file c9tc03645h1.pdf]

**Iridium(III) phosphors with rigid fused-heterocyclic chelating  
architecture for efficient deep-red/near-infrared emission in  
polymer light-emitting diodes**

Caifa You,<sup>a</sup> Denghui Liu,<sup>b</sup> Fanyuan Meng,<sup>c</sup> Yafei Wang,<sup>b</sup> Junting Yu,<sup>b</sup> Song Wang,<sup>\*d</sup>  
Shijian Su<sup>\*c</sup> and Weiguo Zhu<sup>\*a,b</sup>

<sup>a</sup> *College of Chemistry, Key Lab of Environment-Friendly Chemistry and Application  
in the Ministry of Education, Xiangtan University, Xiangtan 411105, China.*

<sup>b</sup> *School of Materials Science and Engineering, Jiangsu Collaboration Innovation  
Center of Photovoltaic Science and Engineering, Jiangsu Engineering Laboratory of  
Light-Electricity-Heat Energy-Converting Materials and Applications, National  
Experimental Demonstration Center for Materials Science and Engineering,  
Changzhou University, Changzhou 213164, P. R. China.*

<sup>c</sup> *State Key Laboratory of Luminescent Materials and Devices, South China  
University of Technology, Guangzhou 510640, P. R. China.*

<sup>d</sup> *Hubei Key Laboratory of Low Dimensional Optoelectronic Materials and Devices  
Hubei University of Arts and Science, Xiangyang, 441053, P. R. China.*

*\*To whom correspondence should be addressed. Email:*

*(W. Z.) [zhuwg18@126.com](mailto:zhuwg18@126.com)*

*(S. S.) [mssjsu@scut.edu.cn](mailto:mssjsu@scut.edu.cn)*

*(S. W.) [wangsong1984@126.com](mailto:wangsong1984@126.com)*

## Contents of Figures and Tables

- Fig. S1:** TGA curves of Ir(III) complexes.
- Fig. S2:** ORTEP plot of (DBQ)<sub>2</sub>Ir(acac).
- Fig. S3:** Packing diagram of (DBQ)<sub>2</sub>Ir(acac) in crystal.
- Fig. S4:** UV-Vis absorption spectra of free ligands in DCM at RT.
- Fig. S5:** Normalized emission spectra of Ir(III) complexes in 2-MeTHF at 77 K.
- Fig. S6:** Normalized absorption spectra of Ir(III) complexes in various solvents.
- Fig. S7:** Emission spectra of Ir(III) complexes in various degassed solvents at RT.
- Fig. S8:** Normalized absorption and emission spectra of HDBPz-11,12-DO.
- Fig. S9:** Normalized absorption and emission spectra of HPPz-11,12-DO.
- Fig. S10:** photophysical properties of (DBQ)<sub>2</sub>Ir(acac) in THF/H<sub>2</sub>O mixtures with different water fractions and relationships between the ratio of  $I/I_0$  and water fraction in THF/H<sub>2</sub>O mixtures.
- Fig. S11:** Absorption, excitation and emission spectra of (DBQ)<sub>2</sub>Ir(acac) in neat film and crystal.
- Fig. S12:** PL spectra of (DBPz-11,12-DO)<sub>2</sub>Ir(acac) in THF/H<sub>2</sub>O mixtures and relationships between the ratio of  $I/I_0$  and water fraction in THF/H<sub>2</sub>O mixtures.
- Fig. S13:** Absorption spectra of Ir(III) complexes in THF/H<sub>2</sub>O mixtures.
- Fig. S14:** PL decay spectra of (DBPz-11,12-DO)<sub>2</sub>Ir(acac) in THF/H<sub>2</sub>O mixtures.
- Fig. S15:** PL spectra of Ir(III) complexes in degassed THF solutions from 10<sup>-3</sup> M to 10<sup>-6</sup> M.
- Fig. S16:** Absorption, excitation and emission spectra of Ir(III) complexes in neat

films.

**Fig. S17:** Transient PL decay curves of Ir(III) complexes in degassed  $\text{CH}_2\text{Cl}_2$  solutions.

**Fig. S18:**  $^1\text{H}$  NMR spectrum of HDBPz-11,12-DO.

**Fig. S19:**  $^{13}\text{C}$  NMR spectrum of HDBPz-11,12-DO.

**Fig. S20:**  $^1\text{H}$  NMR spectrum of  $(\text{DBPz-11,12-DO})_2\text{Ir}(\text{acac})$ .

**Fig. S21:**  $^{13}\text{C}$  NMR spectrum of  $(\text{DBPz-11,12-DO})_2\text{Ir}(\text{acac})$ .

**Fig. S22:**  $^1\text{H}$  NMR spectrum of HPPz-11,12-DO.

**Fig. S23:**  $^1\text{H}$  NMR spectrum of HPPz-11,12-DO.

**Fig. S24:**  $^1\text{H}$  NMR spectrum of  $(\text{PPz-11,12-DO})_2\text{Ir}(\text{acac})$ .

**Fig. S25:**  $^{13}\text{C}$  NMR spectrum of  $(\text{PPz-11,12-DO})_2\text{Ir}(\text{acac})$ .

**Fig. S26:** MALDI-TOF-MS spectrum of HDBPz-11,12-DO.

**Fig. S27:** MALDI-TOF-MS spectrum of HPPz-11,12-DO.

**Fig. S28:** MALDI-TOF-MS spectrum of  $(\text{DBPz-11,12-DO})_2\text{Ir}(\text{acac})$ .

**Fig. S29:** MALDI-TOF-MS spectrum of  $(\text{PPz-11,12-DO})_2\text{Ir}(\text{acac})$ .

**Table S1:** Crystal data and refinement parameters for  $(\text{DBQ})_2\text{Ir}(\text{acac})$  and  $(\text{PPz-11,12-DO})_2\text{Ir}(\text{acac})$ .

**Table S2:** Selected bond lengths ( $\text{\AA}$ ) and angles ( $^\circ$ ) for complex  $(\text{DBQ})_2\text{Ir}(\text{acac})$ .

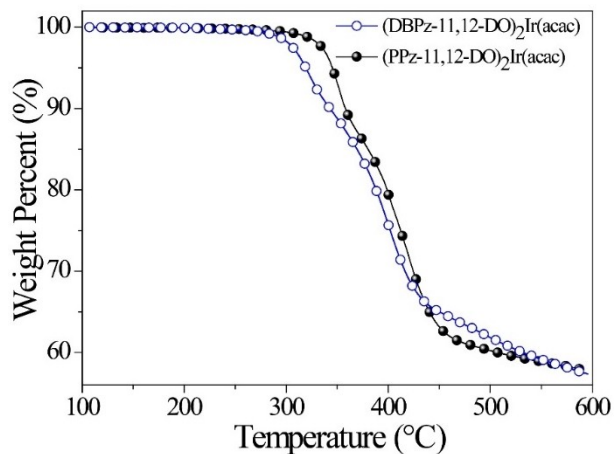

**Fig. S1.** TGA curves of Ir(III) complexes under nitrogen atmosphere.

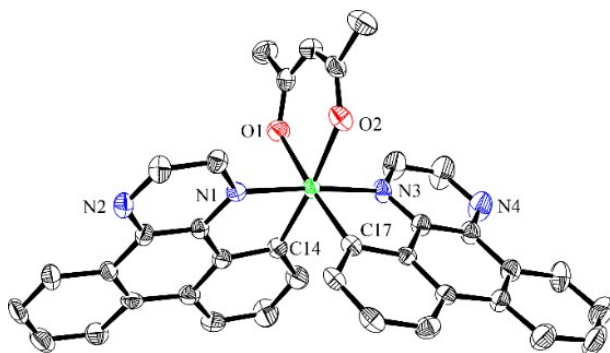

**Fig. S2.** ORTEP plot of  $(\text{DBQ})_2\text{Ir}(\text{acac})$  with 50% probability ellipsoids, Hydrogen atoms are omitted for clarity.

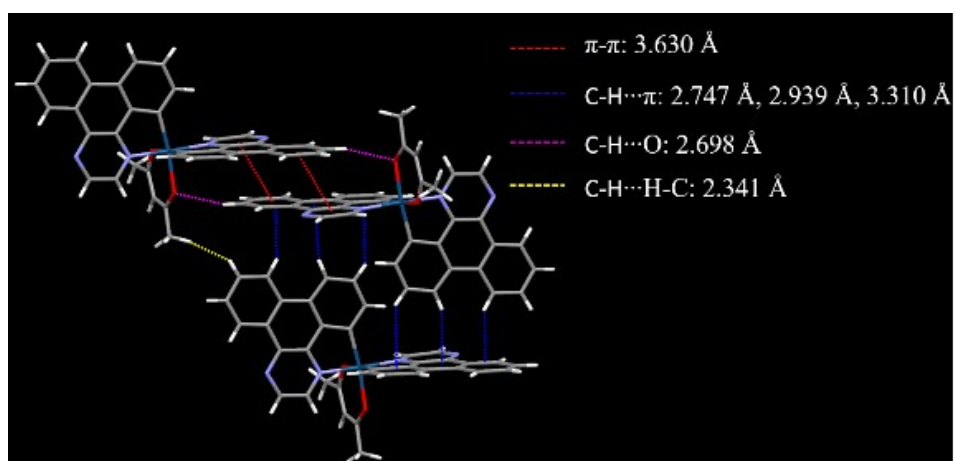

**Fig. S3.** The crystal-packing diagram of  $(\text{DBQ})_2\text{Ir}(\text{acac})$  ( $\pi$ - $\pi$ , C-H $\cdots$  $\pi$ , C-H $\cdots$ O and C-H $\cdots$ H-C intermolecular interactions are marked by dashed lines).

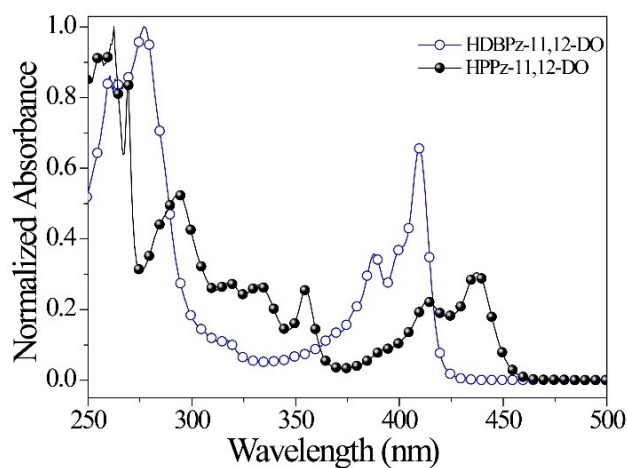

**Fig. S4.** UV-Vis absorption spectra of free ligands in DCM at RT.

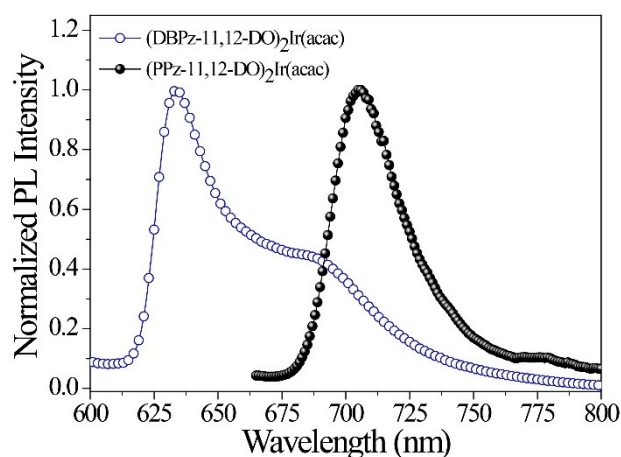

**Fig. S5.** Normalized emission spectra of Ir(III) complexes in dilute 2-MeTHF ( $10^{-5}$  M) at 77 K.

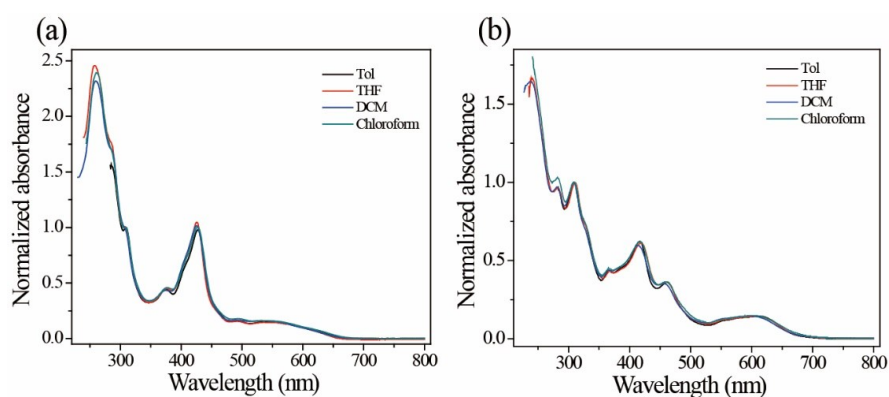

**Fig. S6.** Normalized absorption spectra of Ir(III) complexes in various solvents at RT, (DBPz-11,12-DO)<sub>2</sub>Ir(acac) (a) and (PPz-11,12-DO)<sub>2</sub>Ir(acac) (b).

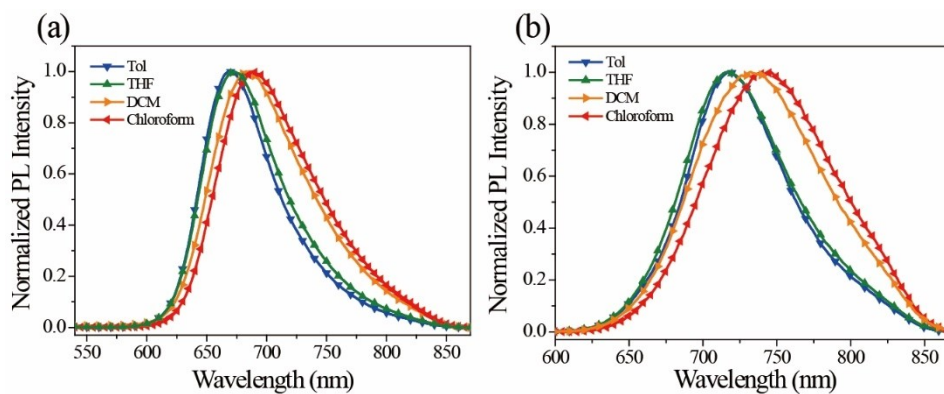

**Fig. S7.** Normalized emission spectra of the two Ir(III) complexes in various degassed solvents at RT, (a) (DBPz-11,12-DO)<sub>2</sub>Ir(acac), Ex=420 nm; and (b) (PPz-11,12-DO)<sub>2</sub>Ir(acac), Ex=450 nm.

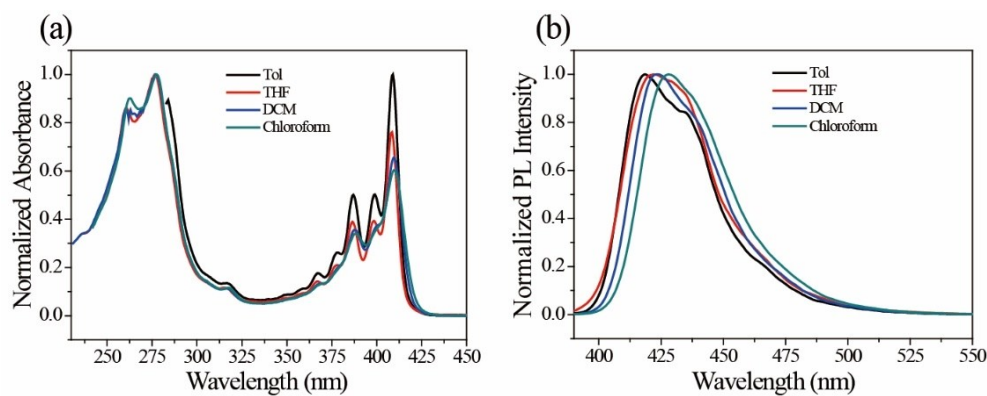

**Fig. S8.** Normalized absorption (a) and emission (b) spectra of HDBPz-11,12-DO in various solvents, Ex=380 nm.

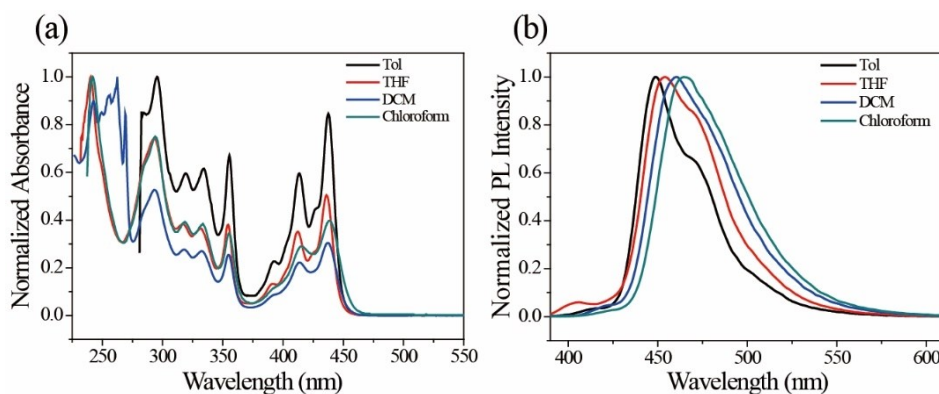

**Fig. S9.** Normalized absorption (a) and emission (b) spectra of HPPz-11,12-DO in various solvents, Ex=350 nm.

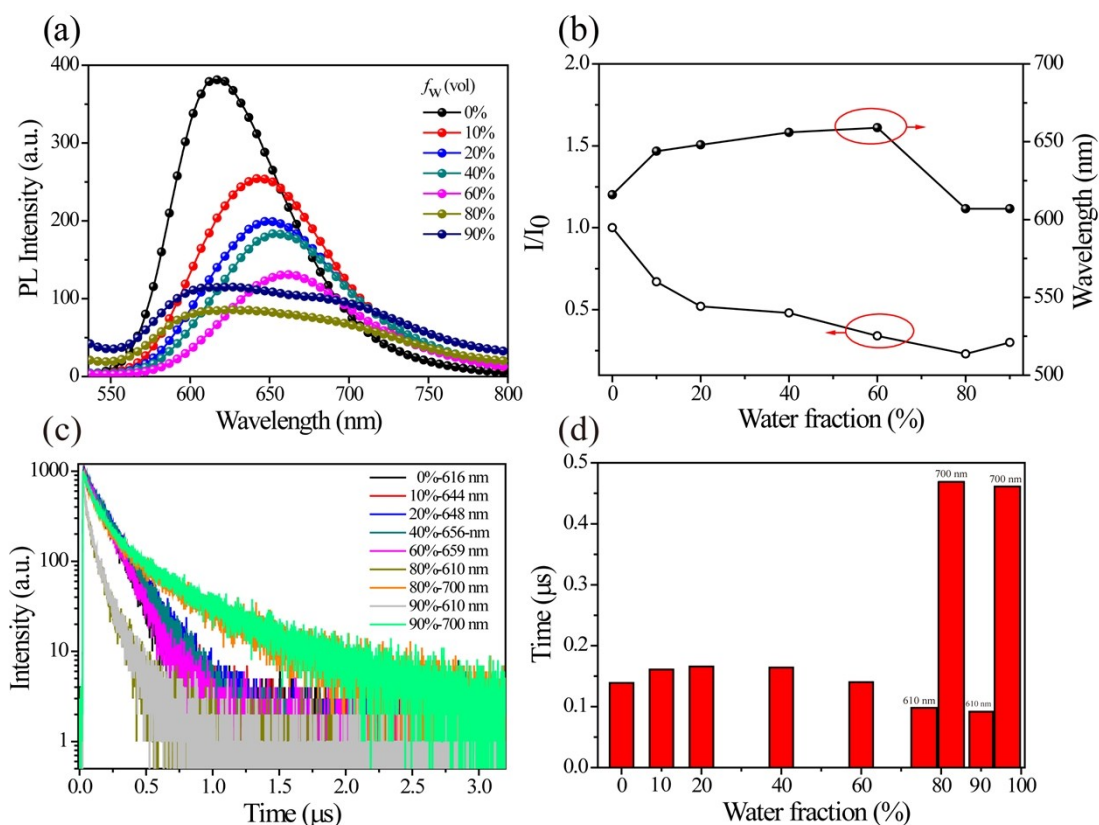

**Fig. S10.** a) PL spectra of  $(\text{DBQ})_2\text{Ir}(\text{acac})$  in THF/ $\text{H}_2\text{O}$  mixtures with different water fractions and a concentration of  $10^{-5}$  M at 298 K; b) relationships between the ratio of  $I/I_0$  and the emission maximum *versus* water fraction in THF/ $\text{H}_2\text{O}$  mixtures;  $I_0$  and  $I$  were the maximum PL intensity in pure THF and in THF/ $\text{H}_2\text{O}$  mixtures, respectively,  $\text{Ex}=370$  nm. c) Transient PL decay spectra of  $(\text{DBQ})_2\text{Ir}(\text{acac})$  in THF/ $\text{H}_2\text{O}$  mixtures; d) lifetime *versus* water fractions in THF/ $\text{H}_2\text{O}$  mixtures.

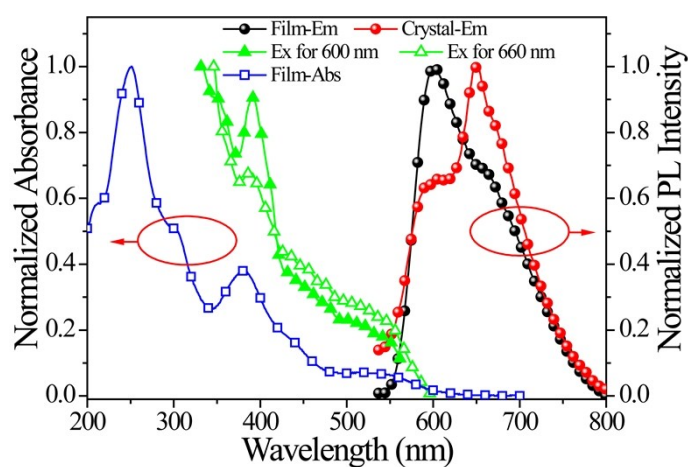

**Fig. S11.** PL spectra of  $(\text{DBQ})_2\text{Ir}(\text{acac})$  in film and crystal,  $\text{Ex}=390$  nm.

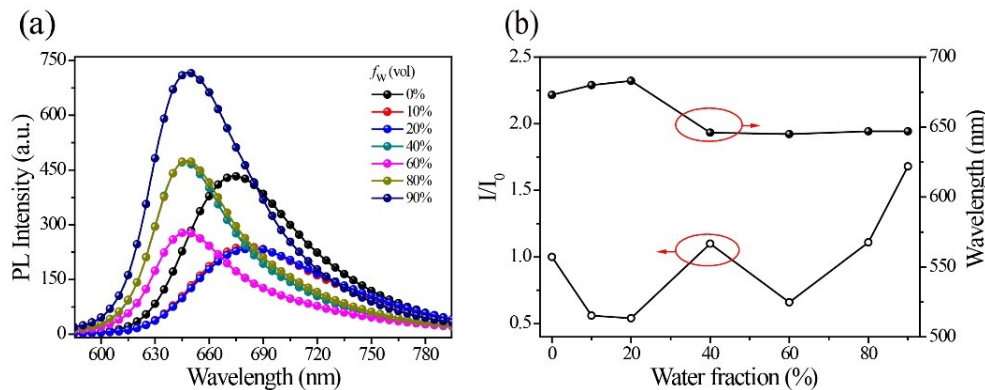

**Fig. S12.** a) PL spectra of  $(\text{DBPz-11,12-DO})_2\text{Ir}(\text{acac})$  in THF/ $\text{H}_2\text{O}$  mixtures with different water fractions and a concentration of  $10^{-5}$  M at 298 K; b) relationships between the ratio of  $I/I_0$  and the emission maximum *versus* water fraction in THF/ $\text{H}_2\text{O}$  mixtures;  $I_0$  and  $I$  were the maximum PL intensity in pure THF and in THF/ $\text{H}_2\text{O}$  mixtures, respectively,  $\text{Ex}=420$  nm.

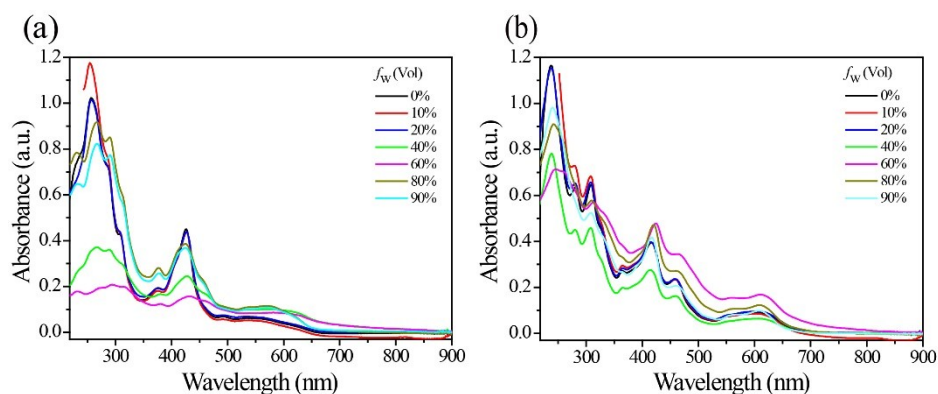

**Fig. S13.** Absorption spectra of  $(\text{DBPz-11,12-DO})_2\text{Ir}(\text{acac})$  (a) and  $(\text{PPz-11,12-DO})_2\text{Ir}(\text{acac})$  (b) in THF/ $\text{H}_2\text{O}$  mixtures with different water fractions and a concentration of  $10^{-5}$  M at 298 K.

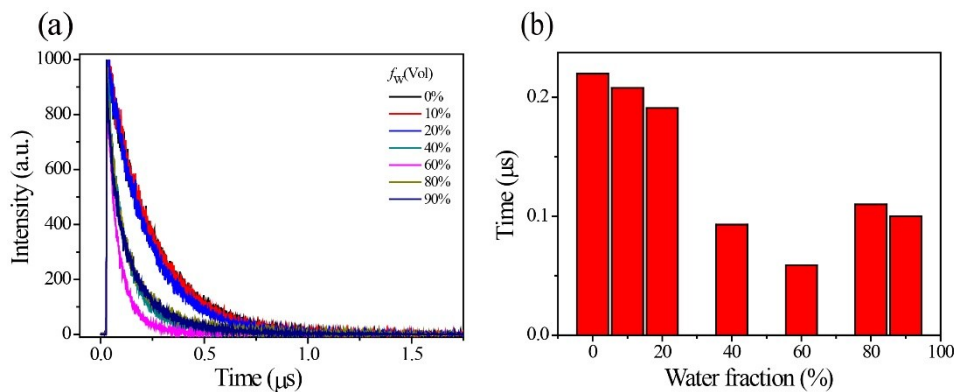

**Fig. S14.** a) Transient PL decay spectra of  $(\text{DBPz-11,12-DO})_2\text{Ir}(\text{acac})$  in THF/ $\text{H}_2\text{O}$



mixtures with different water fractions and a concentration of  $10^{-5}$  M at 298 K; b) Column diagrams of decay times *versus* water fractions in THF/H<sub>2</sub>O mixtures.

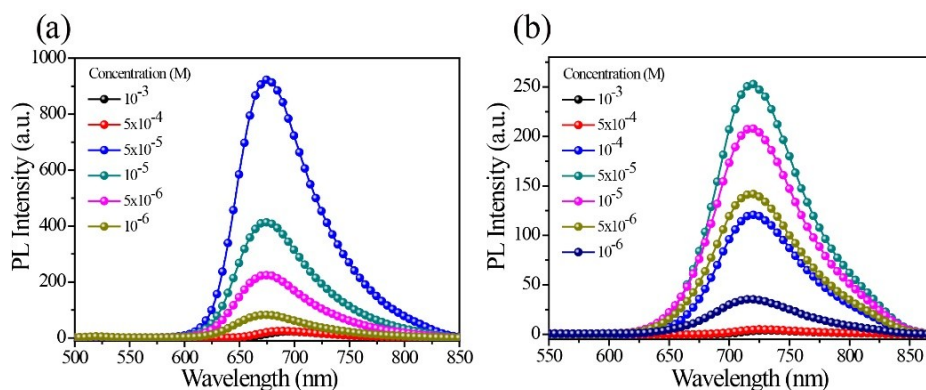

**Fig. S15.** PL spectra of (DBPz-11,12-DO)<sub>2</sub>Ir(acac) (a) and (PPz-11,12-DO)<sub>2</sub>Ir(acac) (b) in THF solution upon concentration from  $10^{-3}$  M to  $10^{-6}$  M, and the absent of the emission spectra of (DBPz-11,12-DO)<sub>2</sub>Ir(acac) in  $10^{-4}$  M resulted from limitations of the instrument, excited at 420 and 450 nm, respectively.

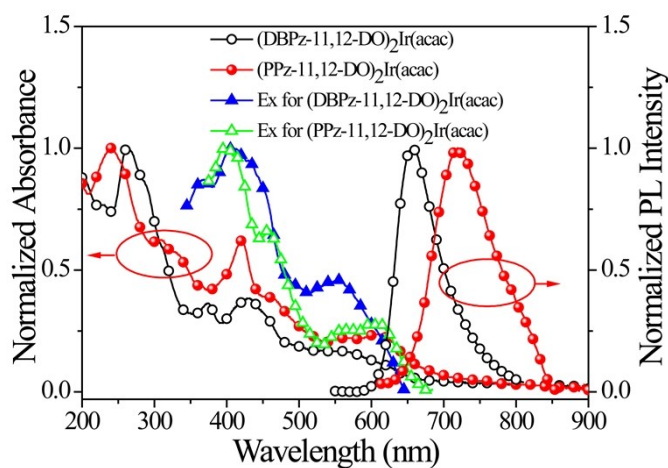

**Fig. S16.** Absorption, excitation and emission spectra of (DBPz-11,12-DO)<sub>2</sub>Ir(acac) and (PPz-11,12-DO)<sub>2</sub>Ir(acac) in neat film, excited at 420 and 450 nm, respectively.

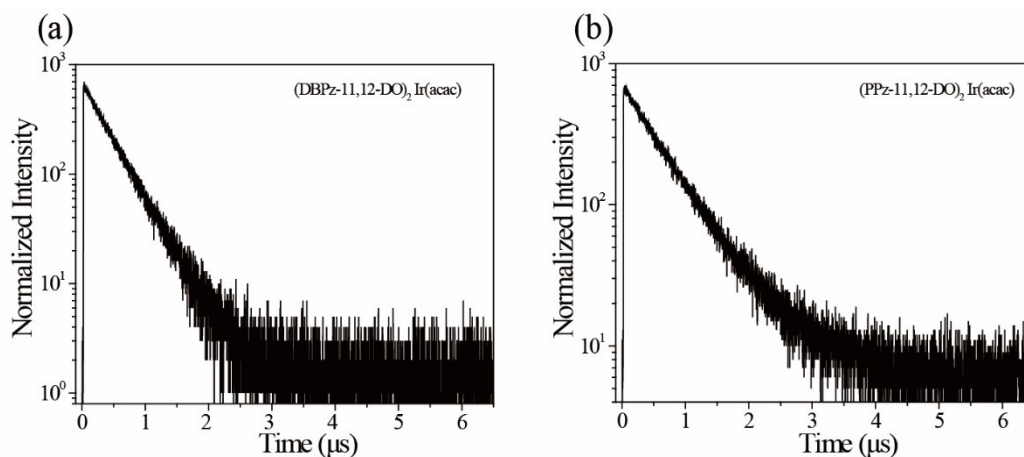

**Fig. S17.** Transient PL decay curves of (DBPz-11,12-DO)<sub>2</sub>Ir(acac) (a) and (PPz-11,12-DO)<sub>2</sub>Ir(acac) (b) in degassed CH<sub>2</sub>Cl<sub>2</sub> solutions.

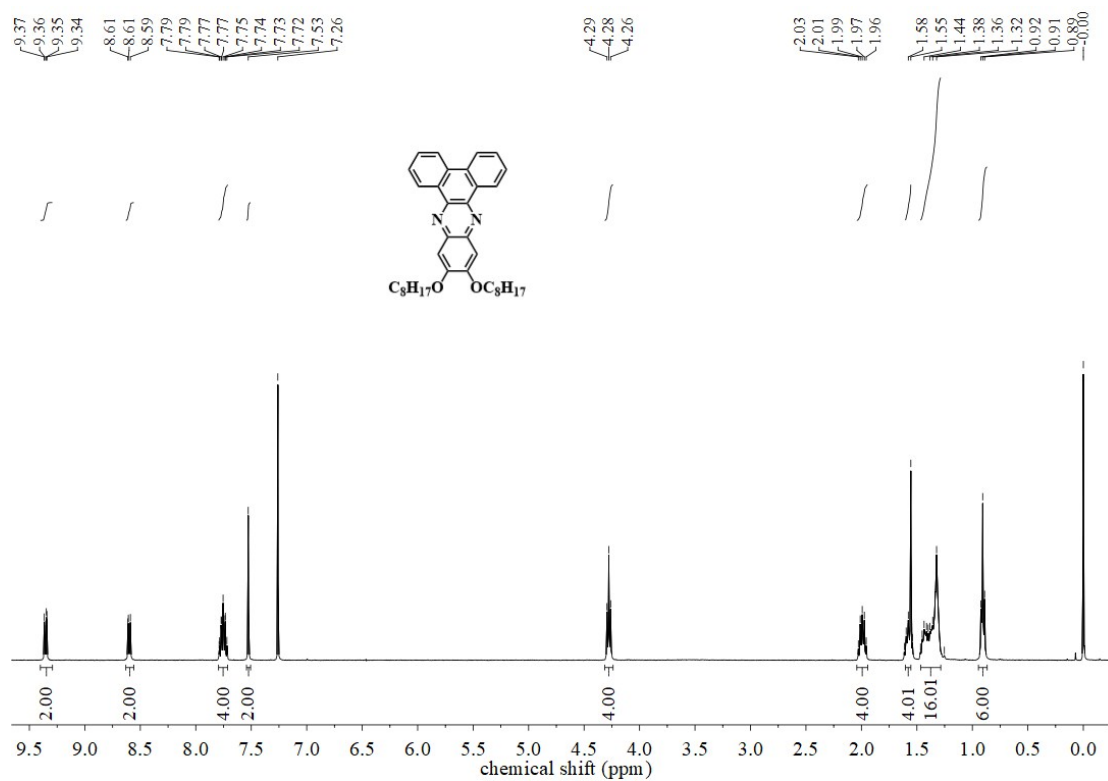

**Fig. S18.** <sup>1</sup>H NMR spectrum of HDBPz-11,12-DO (400 MHz, CDCl<sub>3</sub>).

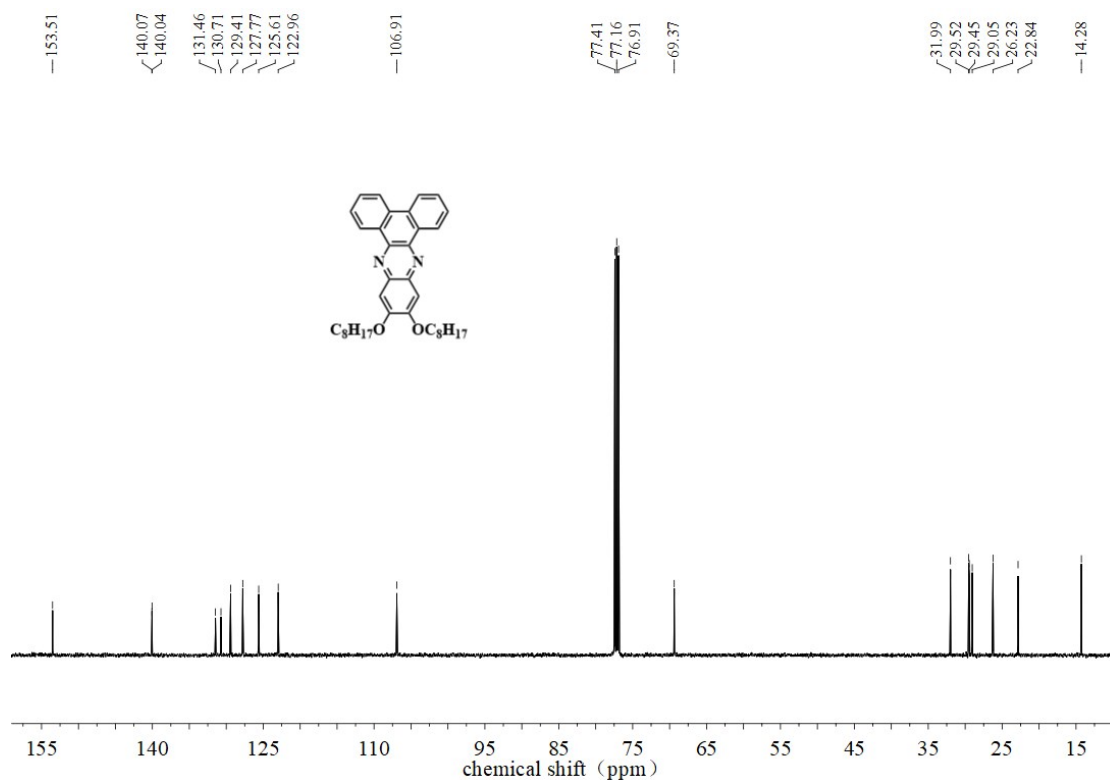

**Fig. S19.**  $^{13}\text{C}$  NMR spectrum of HDBPz-11,12-DO (125 MHz,  $\text{CDCl}_3$ ).

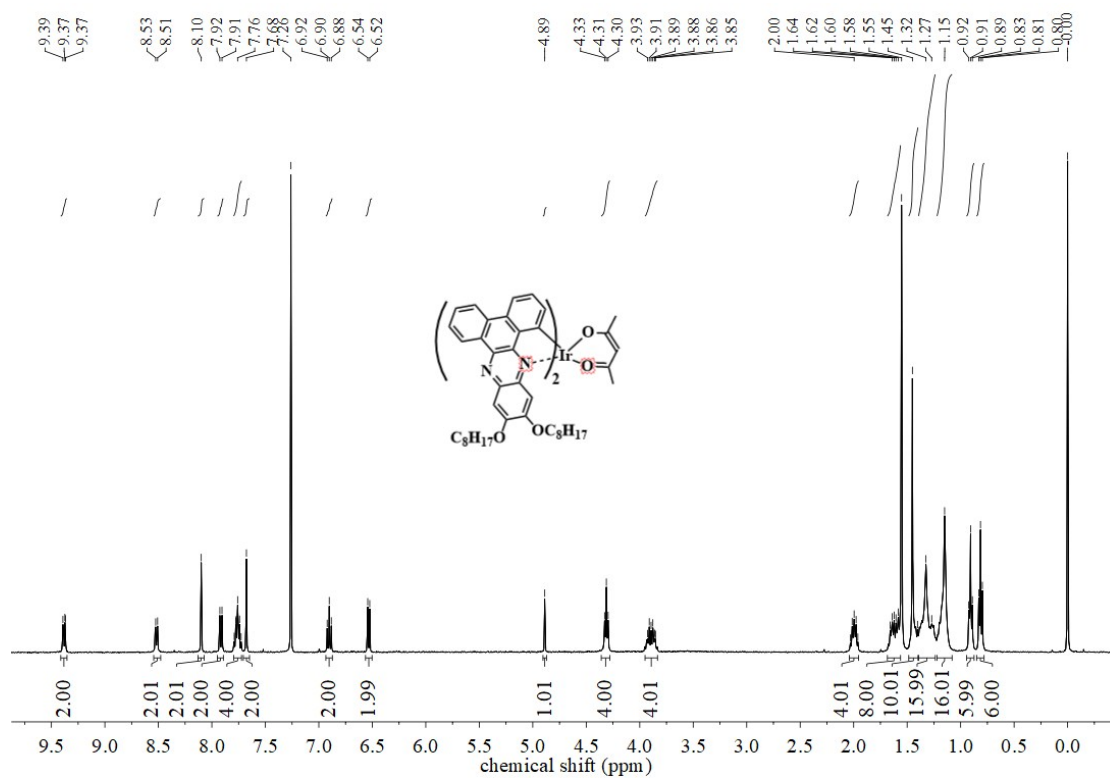

**Fig. S20.**  $^1\text{H}$  NMR spectrum of  $(\text{DBPz-11,12-DO})_2\text{Ir}(\text{acac})$  (400 MHz,  $\text{CDCl}_3$ ).

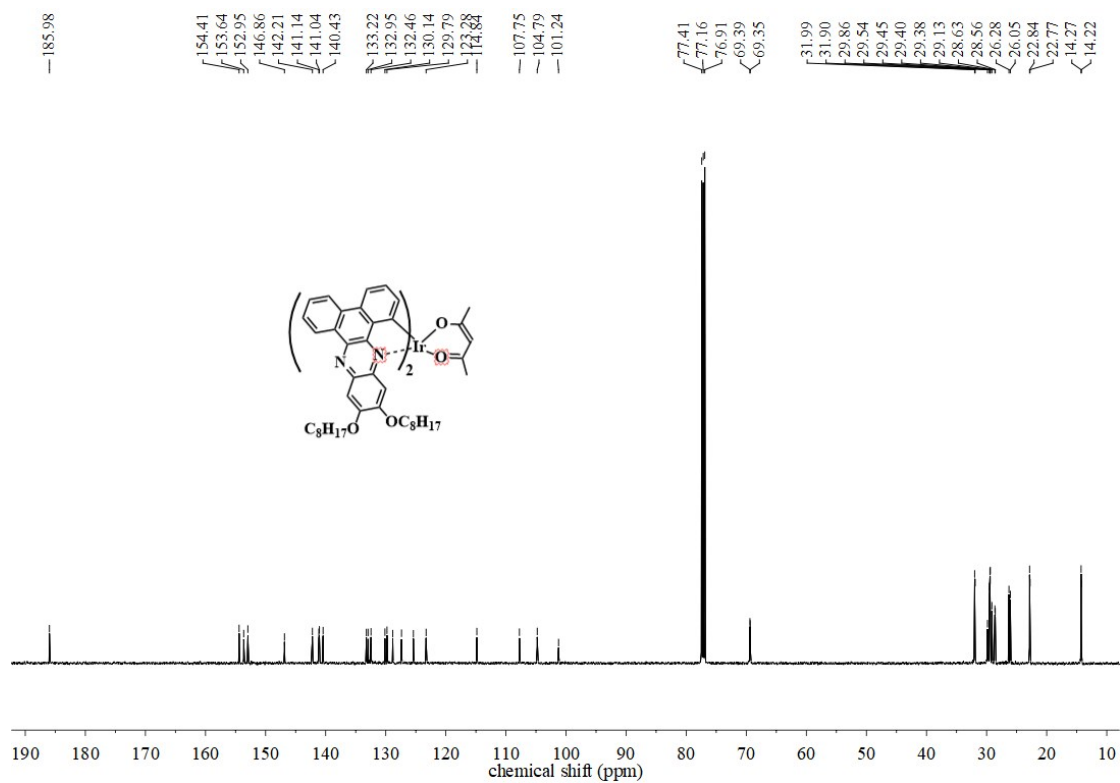

**Fig. S21.** <sup>13</sup>C NMR spectrum of (DBPz-11,12-DO)<sub>2</sub>Ir(acac) (125 MHz, CDCl<sub>3</sub>).

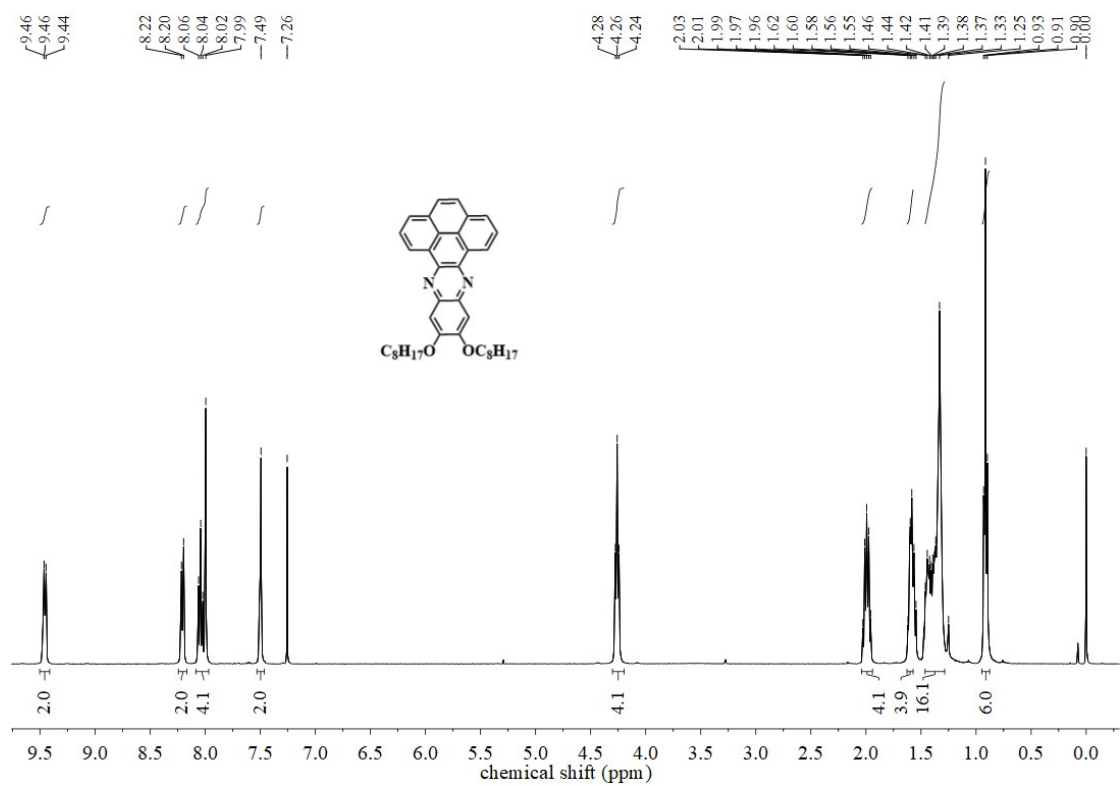

**Fig. S22.** <sup>1</sup>H NMR spectrum of HPPz-11,12-DO (400 MHz, CDCl<sub>3</sub>).



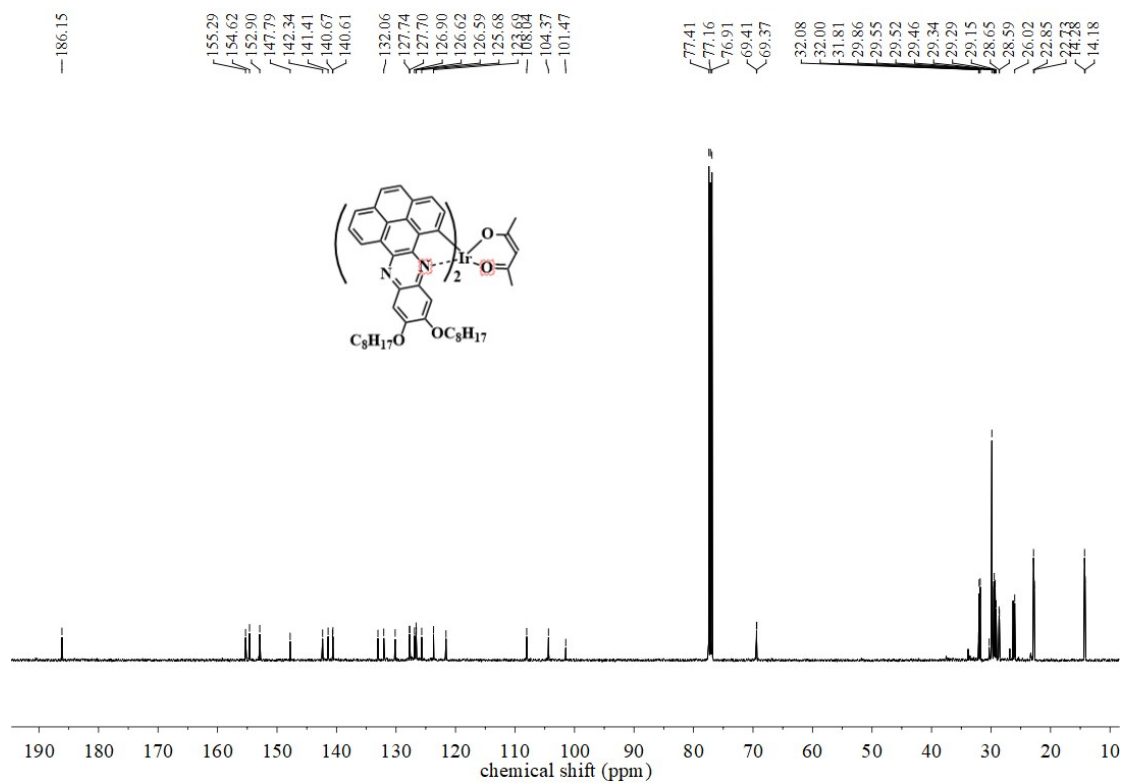

**Fig. S25.**  $^{13}\text{C}$  NMR spectrum of  $(\text{PPz-11,12-DO})_2\text{Ir}(\text{acac})$  (125 MHz,  $\text{CDCl}_3$ ).

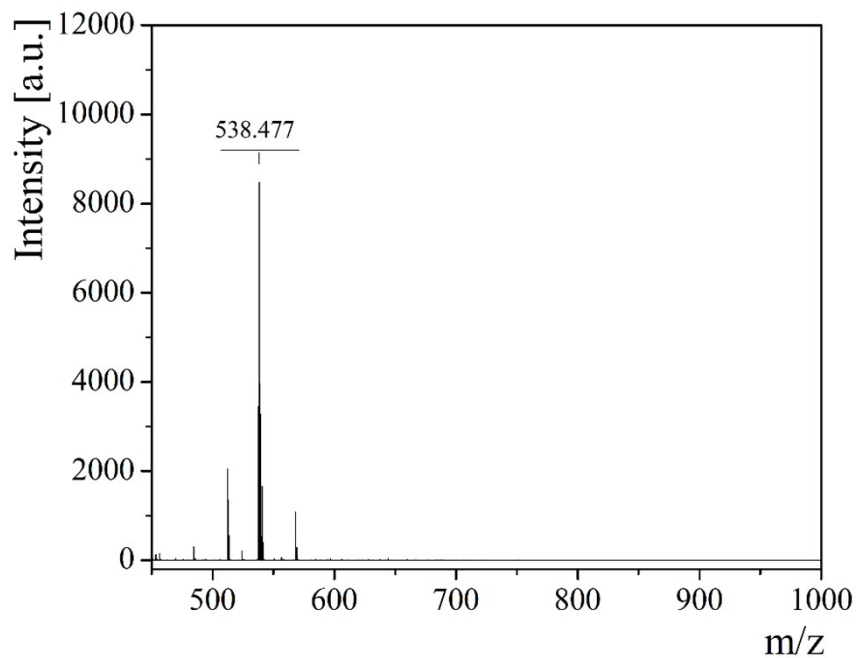

**Fig. S26.** MALDI-TOF-MS spectrum of HDBPz-11,12-DO.

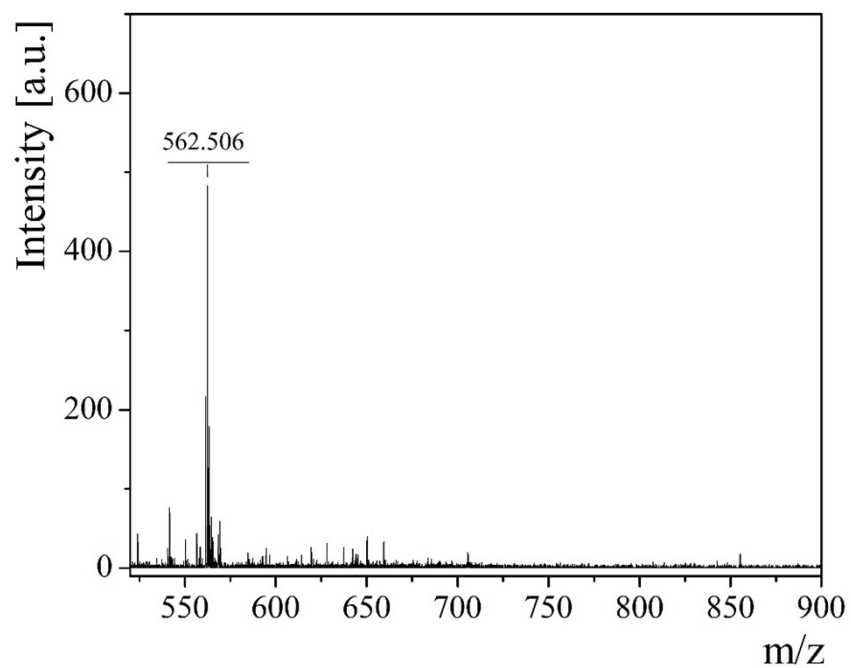

**Fig. S27.** MALDI-TOF-MS spectrum of HPPz-11,12-DO.

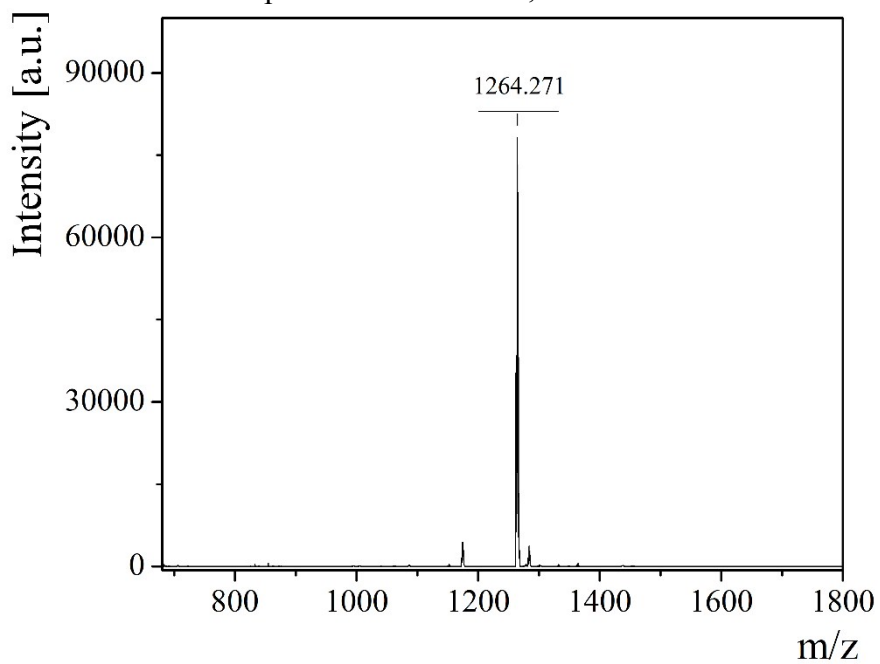

**Fig. S28.** MALDI-TOF-MS spectrum of (DBPz-11,12-DO)<sub>2</sub>Ir(acac).

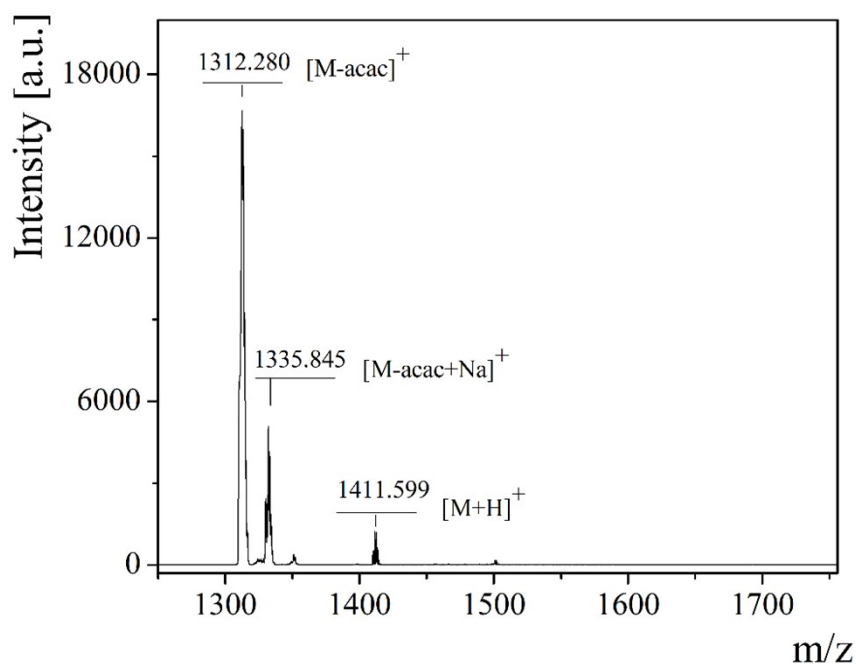

**Fig. S29.** MALDI-TOF-MS spectrum of (PPz-11,12-DO)<sub>2</sub>Ir(acac).

**Table S1.** Crystal data and refinement parameters for complexes (DBQ)<sub>2</sub>Ir(acac) and (PPz-11,12-DO)<sub>2</sub>Ir(acac).

| Sample                          | (DBQ) <sub>2</sub> Ir(acac)                                                                                     | (PPz-11,12-DO) <sub>2</sub> Ir(acac)                                                                            |
|---------------------------------|-----------------------------------------------------------------------------------------------------------------|-----------------------------------------------------------------------------------------------------------------|
| Empirical formula               | C <sub>38</sub> H <sub>26</sub> Cl <sub>3</sub> IrN <sub>4</sub> O <sub>2</sub>                                 | C <sub>81</sub> H <sub>93</sub> IrN <sub>4</sub> O <sub>6</sub>                                                 |
| Formula weight                  | 869.18                                                                                                          | 1410.79                                                                                                         |
| Temperature                     | 173(0) K                                                                                                        | 296(2) K                                                                                                        |
| Wavelength                      | 0.71073 Å                                                                                                       | 1.34139 Å                                                                                                       |
| Crystal system                  | Triclinic                                                                                                       | Triclinic                                                                                                       |
| Space group                     | <i>P</i> -1                                                                                                     | <i>P</i> -1                                                                                                     |
| Unit cell dimensions            | a = 9.9655(9) Å<br>b = 12.2501(11) Å<br>c = 13.6017(12) Å<br>α = 85.163(2)°<br>β = 88.640(2)°<br>γ = 80.607(2)° | a = 13.2845(7) Å<br>b = 16.5525(8) Å<br>c = 17.2928(11) Å<br>α = 82.589(4)°<br>β = 74.698(4)°<br>γ = 76.485(3)° |
| Volume                          | 1632.3(3) Å <sup>3</sup>                                                                                        | 3557.0(4) Å <sup>3</sup>                                                                                        |
| Z                               | 2                                                                                                               | 2                                                                                                               |
| Density (calculated)            | 1.768 mg/m <sup>3</sup>                                                                                         | 1.317 mg/m <sup>3</sup>                                                                                         |
| Absorption coefficient          | 4.378 mm <sup>-1</sup>                                                                                          | 2.684 mm <sup>-1</sup>                                                                                          |
| F(000)                          | 852.0                                                                                                           | 1464                                                                                                            |
| Crystal size                    | 0.18 × 0.12 × 0.08 mm <sup>3</sup>                                                                              | 0.20 × 0.08 × 0.04 mm <sup>3</sup>                                                                              |
| Theta range for data collection | 3.006 to 55.408°                                                                                                | 3.068 to 55.065°                                                                                                |
| Index ranges                    | -13 ≤ h ≤ 13, -15 ≤ k ≤ 16, -17 ≤ l ≤ 17                                                                        | -15 ≤ h ≤ 16, -20 ≤ k ≤ 18, -18 ≤ l ≤ 21                                                                        |



|                                         |                                          |                                       |
|-----------------------------------------|------------------------------------------|---------------------------------------|
| Reflections collected                   | 14843                                    | 36841                                 |
| Independent reflections                 | 7391 [ $R_{\text{int}} = 0.0404$ ]       | 13393 [ $R(\text{int}) = 0.0660$ ]    |
| Completeness to theta = 53.594°         | 95.7 %                                   | 99.3%                                 |
| Absorption correction                   | Semi-empirical from equivalents          |                                       |
| Max/min transmission                    | 0.7508 / 0.4415                          | 0.7508 / 0.4952                       |
| Refinement method                       | Full-matrix-block least-squares on $F^2$ |                                       |
| Data/restraints/parameters              | 7391/0/435                               | 13393 / 186 / 834                     |
| Goodness-of-fit on $F^2$                | 1.030                                    | 1.031                                 |
| Final R indices<br>[ $I > 2\sigma(I)$ ] | $R_1 = 0.0399$ , $wR_2 = 0.1040$         | $R1 = 0.0623$ , $wR2 = 0.1613$        |
| R indices (all data)                    | $R_1 = 0.0478$ , $wR_2 = 0.1088$         | $R1 = 0.0992$ , $wR2 = 0.1898$        |
| Extinction coefficient                  | n/a                                      | n/a                                   |
| Largest diff. peak and hole             | 1.66 and -1.37 e. $\text{\AA}^{-3}$      | 0.840 and -1.504 e. $\text{\AA}^{-3}$ |
| CCDC number                             | 1914079                                  | 1914075                               |

**Table S2.** Selected bond lengths ( $\text{\AA}$ ) and angles ( $^\circ$ ) for complex  $(\text{DBQ})_2\text{Ir}(\text{acac})$

| bond lengths ( $\text{\AA}$ ) |          | Bond angles ( $^\circ$ ) |            |
|-------------------------------|----------|--------------------------|------------|
| Ir1-N1                        | 2.036(4) | O2-Ir1-O1                | 88.18(15)  |
| Ir1-N3                        | 2.034(4) | C17-Ir1-N3               | 81.51(19)  |
| Ir1-C14                       | 2.014(5) | C14-Ir1-N1               | 81.75(19)  |
| Ir1-C17                       | 1.990(5) | N3-Ir1-N1                | 175.22(17) |
| Ir1-O1                        | 2.146(4) | C14-Ir1-O2               | 173.00(16) |
| Ir1-O2                        | 2.145(4) | C17-Ir1-O1               | 174.03(17) |
